1  
2  
3  
4  
5  
6  
7  
8  
9  
10  
11  
12  
13  
14  
15  
16  
17  
18  
19  
20  
21

Full Title: Incidence, predictors and cognitive dysfunction in post-traumatic epilepsy following a traumatic brain injury: A study protocol

Short Title: Epilepsy and cognitive dysfunction in traumatic brain injury

Irma Wati Ngadimon<sup>1\*</sup>, Mohd. Farooq Shaikh<sup>1</sup>, Devi Mohan<sup>2</sup>, Ching Soong Khoo<sup>3</sup>,  
Wing Loong Cheong<sup>4</sup>, Angel Aledo-Serrano<sup>5</sup>

<sup>1</sup>Neuropharmacology Research Strength, Jeffrey Cheah School of Medicine and Health Sciences, Monash University Malaysia, Bandar Sunway, Selangor, Malaysia

<sup>2</sup>Global Public Health, Jeffrey Cheah School of Medicine and Health Sciences, Monash University Malaysia, Bandar Sunway, Selangor, Malaysia

<sup>3</sup>Neurology Unit, Department of Medicine, Universiti Kebangsaan Malaysia Medical Centre, Kuala Lumpur, Malaysia

<sup>4</sup>School of Pharmacy, Monash University Malaysia, Bandar Sunway, Selangor, Malaysia

<sup>5</sup>Epilepsy Program, Neurology Department, Ruber Internacional Hospital, Madrid, Spain

\*Corresponding author: Irma Wati Ngadimon

Email: [Irma.ngadimon@monash.edu](mailto:Irma.ngadimon@monash.edu)

NOTE: This preprint reports new research that has not been certified by peer review and should not be used to guide clinical practice.

22 **Full Title:**

23 Incidence, predictors and cognitive dysfunction in post-traumatic epilepsy following a  
24 traumatic brain injury: A study protocol

25 Short Title: Epilepsy and cognitive dysfunction in traumatic brain injury.

26

27 **Competing interests:**

28 The authors have declared that no competing interests exist.

29

30 **Abstract:**

31 Approximately 69 million people worldwide are annually affected by traumatic brain  
32 injury (TBI). In Malaysia, the traumatic injury was the leading cause of hospital  
33 admission and death, accounting for one in three emergency visits. Among the most  
34 recognised complication of TBI is post-traumatic epilepsy (PTE), which is an essential  
35 contributor to morbidity and mortality. However, there is a lack of local epidemiological  
36 data on PTE in Malaysia. This study aims to describe the incidence and predictors of  
37 PTE among TBI patients admitted to a tertiary healthcare centre in Kuala Lumpur,  
38 Malaysia. We hypothesised that increases in age, race, and severity of brain injury  
39 are among the main potential predictors of PTE. It will also provide evidence that  
40 patients with epilepsy following TBI are associated with significant impairment in  
41 cognitive performance than TBI patients without epilepsy. An analysis of a two years  
42 retrospective cohort will be employed, of which adults with a history of admission for  
43 TBI in 2019 and 2020 will be contacted, and the development of epilepsy will be  
44 ascertained using a validated tool and confirmed by our neurologists during visits. The

45 patients will then be grouped into two, with PTE and without PTE, and assessed their  
46 cognitive performance by clinical psychologists. Given that the management of TBI  
47 and PTE patients involves a multidisciplinary team, the findings might be significant to  
48 many healthcare providers in determining policy and strategise a better treatment.

49

## 50 **Introduction:**

51 At least 10 million people sustain head trauma every year [2,3], making  
52 traumatic brain injury (TBI) one of the leading global causes of death and disease  
53 burden [1]. One of TBI's major complications but poorly understood sequelae is post-  
54 traumatic epilepsy (PTE) [4–6]. PTE is a significant form of symptomatic epilepsies  
55 resulting from various brain insults [6]. In the general population, it causes 10–20% of  
56 symptomatic epilepsy and 5% of all epilepsy [7].

57 PTE poses significant health and socio-economic problem worldwide [8].  
58 People with epilepsy are three times more likely to die prematurely than the general  
59 population, with the absolute number of deaths increasing by 39% [1]. Post-traumatic  
60 epileptic seizures are distinguished from non-epileptic post-traumatic seizures (PTS)  
61 by their etiology and timing after the trauma. Late seizures, occurring more than a  
62 week after the initial event, characterise PTE. [9]. The time between a TBI and the  
63 onset of the first seizure varies greatly [10]. In about 80% of cases, the first seizure  
64 following PTE occurs within the first year, and more than 90% of cases occur by the  
65 end of the second year [11]. Eighty-two percent of patients who experienced a late-  
66 onset seizure (more than a week after injury) also experienced a second seizure within  
67 the following two years [8]. Although a seizure during the first week after injury (early  
68 PTS) is linked to a higher incidence of late PTS (after the first week of injury), having

69 a late PTS is correlated with an even higher risk of seizure recurrence [12–14]. The  
70 likelihood of seizures following a TBI has been predicted mathematically by several  
71 authors, but their clinical applicability for the majority of brain-injured people has not  
72 been tested [13]. Researchers have tried to pin down the true prevalence of PTE for  
73 decades, and their findings have yielded a wide range of reported numbers, from 1.3%  
74 to 53.3% [15–17]. This variation may be attributable to differences in the severity of  
75 the initial TBI. The cumulative incidence of PTE was reported to be 4.4 per 100 people  
76 with mild TBI, 7.6% per 100 people with moderate TBI, and 13.6 per 100 people with  
77 severe TBI in a three-year population-based study conducted in the United States [4].

78 In most TBI cases, cognitive difficulties are the most prominent impairments  
79 [18]. However, little is known about how PTE can exaggerate neuropsychological  
80 deficits. Preclinical TBI studies provided scientific proof that PTE may further  
81 deteriorate cognitive performance. This comorbidity is also reported in other  
82 secondary epilepsies, such as post-stroke epilepsy [19]. Cognitive performance  
83 includes motor function, memory, intelligence, attention or concentration, processing  
84 speed, language, and visual-spatial abilities [20]. Researchers found that mice  
85 induced with TBI followed by electroconvulsive shock seizures performed worse in the  
86 Barnes maze than mice who underwent TBI alone [21]. These findings on the "double  
87 hit" mice were related to increased glial activation.

88 Meanwhile, in a study by Shultz and colleagues [22] comparing rats that did or  
89 did not develop PTE at six months post-injury, no significant differences between the  
90 groups were observed in Morris water maze (MWM) performance. The few preclinical  
91 studies that evaluated the impacts of PTE on cognitive functions have yielded  
92 inconclusive results. In some studies, temporal complexities may contribute to the  
93 failure to distinguish between PTE versus non-PTE groups of post-TBI rats. One

94 previous study found an alarming statistic: half of the people with epilepsy exhibit  
95 cognitive dysfunctions in multiple domains, including learning, memory, attention, and  
96 executive functioning [23]. Memory loss, however, is far more common [24]. As a  
97 result, it is prudent to postulate that epilepsy resulting from TBI adds deficits to an  
98 individual with TBI, thereby worsening neuropsychological performance.

99 This study involves two parts. Part I of the study is to determine the etiology of  
100 PTE in TBI individuals to quantify the incidence rate and stratify risks for developing  
101 PTE. Part II of the study examines the cognitive comorbidity of PTE in a diverse multi-  
102 ethnic population. Previously, several authors [5,6,13,25,26] had analysed predictors  
103 for PTE in a large sample of TBI people. Unfortunately, the geographical limitation  
104 prevents the broad generalisation of the results of these investigations. To the best of  
105 our knowledge, this study represents the first investigation in Malaysia with multi-  
106 ethnicity and various demographical backgrounds who were retrospectively reviewed  
107 for up to 2 years after brain injury. The results of this study are intended to add to the  
108 emerging body of knowledge for both professionals and the general public. Individuals  
109 with TBI and PTE face unique challenges that healthcare providers will consider. Due  
110 to this, better services and strategies to enhance these people's lives could be created.  
111 Additionally, people with PTE and their families may be better prepared to deal with  
112 upcoming issues such as memory deficit, driving limits, intelligence, and the effect on  
113 caregivers, family members, and significant others. Furthermore, reducing the burden  
114 of comorbidities linked with decreased cognitive abilities and PTE would substantially  
115 impact the individual, society, and the economy.

116

117 **Significance of the study**

118 Despite a wealth of epidemiological data, there are still many questions regarding the  
119 epidemiology and determinants of outcomes of TBI patients with no definitive answers  
120 and no robust evidence base to guide their management. There is a relative lack of  
121 data on PTE in Malaysia. As a consequence, it has become an underappreciated  
122 condition. Patients with similar injuries may receive very different opinions about their  
123 likely prognosis and the best treatment, depending on their unit and the surgeon who  
124 treats them. Once a risk has been unequivocally associated with PTE, a logical final  
125 step is targeting those individuals with specific predictors in advocating a policy that  
126 aims to strategise the pharmacological or non-pharmacological treatment toward  
127 preventing epilepsy and its cognitive comorbidity. The findings can be used to plan  
128 and evaluate strategies to prevent further deterioration and guide the management of  
129 patients whom PTE has already developed, thereby helping to lighten the burden of ill  
130 health upon the individual and the community.

131

## 132 **Aim and objectives**

### 133 *Study aim:*

134 This project aims to describe the incidence and predictors for PTE among TBI in a  
135 tertiary care center in Malaysia and generate evidence on the cognitive burden of PTE.

### 136 *Study objectives:*

- 137 a. To estimate the incidence of PTE among TBI patients attending Universiti  
138 Kebangsaan Malaysia Medical Centre (UKMMC), Kuala Lumpur, between  
139 2019 to 2020.
- 140 b. To identify potential predictors of PTE among TBI patients in UKMMC, Kuala  
141 Lumpur.

142 c. To determine the association between PTE and cognitive impairment in the  
143 study population

144

### 145 **Research Question**

146 i. What is the incidence of PTE among the TBI patients attending UKMMC, Kuala  
147 Lumpur, between 2019 to 2020?

148 ii. What are the potential predictors of PTE among the TBI population in UKMMC,  
149 Kuala Lumpur?

150 iii. Does PTE correlate with cognitive impairment in TBI patients?

151

### 152 **Materials and method**

#### 153 *Study design and setting:*

154 This retrospective cohort study will take place in UKMMC, Kuala Lumpur, from March  
155 2022 until March 2024. All TBI patients admitted from 2019 to 2020 to UKMMC that  
156 meet the inclusion criteria will be retrieved from the hospital ward census.

#### 157 *Inclusion criteria:*

158 Inclusion criteria are (a) above 18 years old, (b) patient or guardian able to understand  
159 and speak English/Malay, and (c) with a history of admission to the Neurosurgery ward  
160 in UKMMC for traumatic brain injury caused between 2019 to 2020.

#### 161 *Exclusion criteria:*

162 Patients are excluded if (a) the patient or guardian does not understand Malay/English,  
163 (b) declines to participate, (c) individuals with pre-existing epilepsy before TBI, (d)  
164 brain disorder that may cause epilepsy, e.g., brain tumor, stroke, meningitis, dementia.

165

166 *Sample and sampling:*

167 We will approach All TBI patients meeting the inclusion criteria retrieved from the  
168 ward census.

169

170 **a) Study Part I: Determine the incidence and predictors of PTE**

171 *Sample size calculation:*

172 The reported incidence of PTE range from about 1% to 18.5% in year 1 [8,27–30].

173 Hence for a cumulative incidence of 18.5%, the sample size for 95% CI is 232 with an

174 alpha error of 5% (<https://www.openepi.com/SampleSize/SSPropor.htm>). Assuming

175 a drop out of 10%, thus  $232 + 23 = 255$ , rounded off to 260. Therefore, the TBI subjects

176 to be recruited are 260.

177

178 *Data collection process:*

179 The study flowchart is depicted in Fig 1. A TBI database will be formed based on the

180 list. The patient's medical records in UKMMC will be retrieved from the medical record

181 unit to find related demographic and clinical information, which are:

182 • Demographic and basal variables:

183 Age, gender, ethnicity, comorbid illness, and medical history focus on

184 neurological conditions.

185

186 • TBI characteristics during admission:

187 Glasgow Coma Scale (GCS), loss of consciousness, vomiting, post-traumatic

188 seizure (PTS), cranial surgery, and neuroimaging (looking for different

189 aspects, such as subdural hematoma (SDH), subarachnoid hemorrhage



190 (SAH), extradural hemorrhage (EDH), Intraparenchymal hemorrhage (IPH),  
191 midline shift, hydrocephalus, cerebral edema, and skull fracture).

192

193 • Seizure and epilepsy evaluation:

194 Seizures occurrence in-ward (if any), type, duration of seizure episode, EEG  
195 monitoring for evidence of epileptogenesis, epilepsy diagnosis, and anti-  
196 seizure medication.

197

198 An invitation letter that mentions the researcher's background, the study's aims, and  
199 the design will be sent to the patients' home addresses. Next, patients will be  
200 contacted by telephone to ascertain their epilepsy using a validated instrument  
201 adapted from a study by Ottman et al. [31] and the Malay version by Fong et al. [32].  
202 Permission to use the original screening instruments has been obtained from both  
203 authors.

204 We made some modifications to the scoring system as below. We classified the  
205 response as positive having epilepsy following TBI if the subject answered as:

- 206 i. Q1 and Q3d: "No" or "don't know" and  
207 ii. Any Q2, Q3a, b, c, e, f, g: "Yes" or "possible."

208 The following questions were also asked of patients with positive symptoms.  
209 Responses were recorded in a subject data sheet (APPENDIX III).

- 210 i. Before the TBI, did the patient experience seizures or epilepsy?  
211 ii. Have the most recent seizure(s) occurred more than seven days after the  
212 TBI?

213       iii.     Has the patient been diagnosed with epilepsy or a seizure disorder since  
214             the TBI diagnosis? If so, when was the date of diagnosis, and which  
215             clinician/hospital made the diagnosis?

216       iv.     Any anti-seizure /anti-epileptic medication received?

217

218     All screened cases will be discussed with a consultant neurologist. Patients who  
219     declared having symptoms of PTE but have not sought any treatment determined by  
220     a record of follow-up in UKMMC will be directed to a neurologist for clinical observation  
221     and further treatment. Electroencephalography (EEG) will be used as an adjunct  
222     diagnostic tool. Then, patients who consented to cognitive assessment will be  
223     grouped into two, with PTE and without PTE. The cognitive assessment will be  
224     performed by our clinical psychologist and trained researcher at Neurology Clinic  
225     UKMMC or by home visit.

226     *Consent taking:*

227     The consent-taking process will be done verbally at the beginning of the phone call  
228     (APPENDIX IV). First, the researcher will introduce herself and explain the purpose  
229     of the phone call. Then, the researcher will play a pre-recorded Patient Information  
230     Sheet (PIS) script to ensure transparency (APPENDIX V). The patient/ guardian will  
231     be given sufficient time to think and ask questions afterward. Next, verbal consent  
232     from the patient or guardian will be taken before the interview, and the process will be  
233     recorded. The phone call will be discontinued if no permission is given. Suppose the  
234     patient is not fit to be interviewed (e.g., hearing impairment or cognitively not fit to  
235     answer); in that case, the patient's guardian will be contacted.

236

237 **b) Study Part II: Cognitive assessments**

238 *Sample size calculation:*

239 The next part of the study is the sub-analysis of cognitive performance. The ratio of  
240 individuals from Part I in the PTE group to individuals in the non-PTE group (as the  
241 control group) to be recruited is 1:3. The number of PTE patients depends upon the  
242 incidence within the sample of 260. For example, the incidence of PTE is 18.5% which  
243 means 48, so 48 subjects in the PTE group vs. 144 subjects in the non-PTE group.  
244 The control group will be age-matched and gender-matched with the study group.

245

246 *Data collection process:*

247 The following is the cognitive assessments and anxiety/depression test involved:

- 248 i. Addenbrooke's Cognitive Examination-III (ACE-III) test [33] with both  
249 English and Malay versions [34].
- 250 ii. Wechsler Adult Intelligence Scale (WAIS-IV) subtest: symbol search and  
251 coding [35].
- 252 iii. Comprehensive Trail Making Test (CTMT) [36,37].
- 253 iv. Depression, Anxiety and Stress Scale (DASS 21) [38,39].

254

255

256 *Data analysis:*

257 Statistical analysis will be performed using SPSS 28.0. Chi-square test or Fisher exact  
258 test will be conducted to compare categorical data, independent sample t-test for  
259 continuous variables, and ANOVA with repeated measures to study between subjects'  
260 factor group, within subjects' factor time, and post-doc tests with Bonferroni correction

261 method. Pearson correlations and logistic regression analysis will determine if the  
262 variables are significantly related. The cognitive score difference between the two  
263 groups will be analysed using SPSS.

264

265 *Ethics approval:*

266 This study has been approved by the Research Ethics Committee, The National  
267 University of Malaysia (UKM PPI/111/8/JEP-2022-072).

268

269 *Status and timeline of study:*

270 The TBI patients' database has been formed, and participant recruitment is in  
271 progress. The study is expected to be completed by June 2023. The data analysis  
272 will be performed by July 2023, and the research article will be completed by  
273 September 2023.

274 **Discussion:**

275 This study will benefit a multidisciplinary team involved in managing TBI patients, like  
276 critical care physicians, neurosurgeons, neurologist rehabilitation specialists, and  
277 clinical psychologists. The results will help clinicians to understand the best way to  
278 treat TBI and PTE cases and serve as a source of information to support care  
279 decisions in designing therapies that would improve the quality of life of TBI patients.

280 There are several limitations of this study. It is a single-center study; thus, the  
281 sample may not represent all geographic regions of Malaysia. Nonetheless, to our  
282 knowledge, our study constitutes the first analysis of PTE incidence in Malaysia. As  
283 with the other retrospective study designs, the results will rely on whatever information  
284 is available in the medical record during data collection. Thus, there might be  
285 unrecorded or unavailable information. To deal with it, we will try to capture important

286 details such as the patients' TBI history, education level, and any signs and symptoms  
287 of seizure/epilepsy during the phone interview session.

288 We anticipate that patients willing to come for cognitive assessment might be  
289 cognitively well, thus leading to the skewness of results. We offer a home visit for  
290 individuals with ambulatory problems to minimise bias.

291 Another challenge is that the contacts provided may no longer be in service.  
292 The previous study shows that some may not want to answer calls due to business or  
293 worry about answering unknown phone numbers [40]. To reduce this problem, we will  
294 send a letter to the individual's home address to mention our study purpose and action  
295 plan to contact them. In the letter, we will provide the team telephone numbers and a  
296 Q.R. code linked to Whatsapp so they can propose their preferred date and time for a  
297 phone interview. A token of RM20 will also be provided to cover the petrol cost of  
298 patients participating in the cognitive assessments.

299 **Author's contributions:**

300 IWN: Data curation, Writing, Investigation, Formal Analysis

301 MFS: Conceptualization, Project Administration, Funding Acquisition

302 DM: Conceptualisation, Formal Analysis, Supervision

303 CSK: Investigation, Supervision

304 WLC: Validation, Supervision

305 AAS: Validation, Supervision

306

307

308 **Acknowledgements:**

309 This work forms part of the first author's Ph.D. IWN.

310

311 **References:**

- 312 1. World Health Organization. Global Actions on epilepsy and other neurological  
313 disorders. Vol. 4422, The Seventy-third World Health Assembly. 2020.
- 314 2. Roozenbeek B, Maas AIR, Menon DK. Changing patterns in the epidemiology  
315 of traumatic brain injury. *Nat Rev Neurol*. 2013;9(4):231–6.
- 316 3. Beghi E, Giussani G, Abd-Allah F, Abdela J, Abdelalim A, Abraha HN, et al.  
317 Global, regional, and national burden of epilepsy, 1990–2016: a systematic  
318 analysis for the Global Burden of Disease Study 2016. *Lancet Neurol*. 2019  
319 Apr 1;18(4):357–75.
- 320 4. Ferguson PL, Smith GM, Wannamaker BB, Thurman DJ, Pickelsimer EE,  
321 Selassie AW. A population-based study of risk of epilepsy after hospitalization  
322 for traumatic brain injury. *Epilepsia [Internet]*. 2009/10/23. 2010;51(5):891–8.  
323 Available from: [https://onlinelibrary.wiley.com/doi/pdfdirect/10.1111/j.1528-](https://onlinelibrary.wiley.com/doi/pdfdirect/10.1111/j.1528-1167.2009.02384.x?download=true)  
324 [1167.2009.02384.x?download=true](https://onlinelibrary.wiley.com/doi/pdfdirect/10.1111/j.1528-1167.2009.02384.x?download=true)
- 325 5. Xu T, Yu X, Ou S, Liu X, Yuan J, Huang H, et al. Risk factors for post-  
326 traumatic epilepsy: A systematic review and meta-analysis. *Epilepsy Behav*  
327 *[Internet]*. 2017;67:1–6. Available from:  
328 <http://www.sciencedirect.com/science/article/pii/S152550501630169X>
- 329 6. Yeh CC, Chen TL, Hu CJ, Chiu WT, Liao CC. Risk of epilepsy after traumatic  
330 brain injury: a retrospective population-based cohort study. *J Neurol*  
331 *Neurosurg Psychiatry [Internet]*. 2012/11/03. 2013;84(4):441–5. Available

- 332 from: <https://www.ncbi.nlm.nih.gov/pubmed/23117492>
- 333 7. Lowenstein DH. Epilepsy after head injury: An overview. *Epilepsia* [Internet].  
334 2009;50:4–9. Available from: [https://dx.doi.org/10.1111/j.1528-](https://dx.doi.org/10.1111/j.1528-1167.2008.02004.x)  
335 [1167.2008.02004.x](https://dx.doi.org/10.1111/j.1528-1167.2008.02004.x)
- 336 8. Ritter AC, Wagner AK, Fabio A, Pugh MJ, Walker WC, Szaflarski JP, et al.  
337 Incidence and risk factors of post-traumatic seizures following traumatic brain  
338 injury: A Traumatic Brain Injury Model Systems Study. *Epilepsia* [Internet].  
339 2016 Dec;57(12):1968–77. Available from:  
340 [https://www.scopus.com/inward/record.uri?eid=2-s2.0-](https://www.scopus.com/inward/record.uri?eid=2-s2.0-84995376470&doi=10.1111%2Fepi.13582&partnerID=40&md5=663d55e78b67eb2fe6bf4db9bd11e866)  
341 [84995376470&doi=10.1111%2Fepi.13582&partnerID=40&md5=663d55e78b6](https://www.scopus.com/inward/record.uri?eid=2-s2.0-84995376470&doi=10.1111%2Fepi.13582&partnerID=40&md5=663d55e78b67eb2fe6bf4db9bd11e866)  
342 [7eb2fe6bf4db9bd11e866](https://www.scopus.com/inward/record.uri?eid=2-s2.0-84995376470&doi=10.1111%2Fepi.13582&partnerID=40&md5=663d55e78b67eb2fe6bf4db9bd11e866)
- 343 9. Gupta YK, Gupta M. Post traumatic epilepsy: A review of scientific evidence.  
344 *Indian J Physiol Pharmacol*. 2006/07/21. 2006;50(1):7–16.
- 345 10. Rao VR, Parko KL. Clinical approach to post-traumatic epilepsy. *Semin Neurol*  
346 [Internet]. 2015/02/26. 2015;35(1):57–63. Available from: [https://www.thieme-](https://www.thieme-connect.com/products/ejournals/pdf/10.1055/s-0035-1544239.pdf)  
347 [connect.com/products/ejournals/pdf/10.1055/s-0035-1544239.pdf](https://www.thieme-connect.com/products/ejournals/pdf/10.1055/s-0035-1544239.pdf)
- 348 11. Martins da Silva A., Rocha Vaz A., Ribeiro I., Melo A.R., Nune B.  
349 Controversies in Posttraumatic Epilepsy. In: Pickard J.D., Maira G. PCE,  
350 editors. *Acta Neurochirurgica*. Vienna: Springer; 1990. p. 48–51.
- 351 12. Piccenna L, Shears G, O'Brien TJ. Management of post-traumatic epilepsy:  
352 An evidence review over the last 5 years and future directions. *Epilepsia Open*  
353 [Internet]. 2017 Jun;2(2):123–44. Available from:  
354 <https://onlinelibrary.wiley.com/doi/abs/10.1002/epi4.12049>

- 355 13. Englander J, Bushnik T, Duong TT, Cifu DX, Zafonte R, Wright J, et al.  
356 Analyzing risk factors for late post-traumatic seizures: a prospective,  
357 multicenter investigation. Arch Phys Med Rehabil [Internet]. 2003/03/15.  
358 2003;84(3):365–73. Available from:  
359 <https://www.ncbi.nlm.nih.gov/pubmed/12638104>
- 360 14. Yu T, Liu X, Sun L, Wu J, Wang Q. Clinical characteristics of post-traumatic  
361 epilepsy and the factors affecting the latency of PTE. BMC Neurol. 2021  
362 Aug;21(1):301.
- 363 15. Mazzini L, Cossa F. M, Angelino E, Campini R, Pastore I, Monaco F.  
364 Posttraumatic epilepsy: Neuroradiologic and neuropsychological assessment  
365 of long-term outcome. Epilepsia [Internet]. 2003;44(4):569–74. Available from:  
366 [https://onlinelibrary.wiley.com/doi/pdfdirect/10.1046/j.1528-](https://onlinelibrary.wiley.com/doi/pdfdirect/10.1046/j.1528-1157.2003.34902.x?download=true)  
367 [1157.2003.34902.x?download=true](https://onlinelibrary.wiley.com/doi/pdfdirect/10.1046/j.1528-1157.2003.34902.x?download=true)
- 368 16. Raymont V, Salazar AM, Lipsky R, Goldman D, Tasick G, Grafman J.  
369 Correlates of post-traumatic epilepsy 35 years following combat brain injury.  
370 Neurology [Internet]. 2010;75(3):224–9. Available from:  
371 [https://ezproxy.lib.monash.edu.au/login?url=http://ovidsp.ovid.com/ovidweb.cgi](https://ezproxy.lib.monash.edu.au/login?url=http://ovidsp.ovid.com/ovidweb.cgi?T=JS&CSC=Y&NEWS=N&PAGE=fulltext&D=med8&AN=20644150)  
372 [?T=JS&CSC=Y&NEWS=N&PAGE=fulltext&D=med8&AN=20644150](https://ezproxy.lib.monash.edu.au/login?url=http://ovidsp.ovid.com/ovidweb.cgi?T=JS&CSC=Y&NEWS=N&PAGE=fulltext&D=med8&AN=20644150)
- 373 17. Ritter AC, Wagner AK, Fabio A, Pugh MJ, Walker WC, Szaflarski JP, et al.  
374 Incidence and risk factors of post-traumatic seizures following traumatic brain  
375 injury: A Traumatic Brain Injury Model Systems Study. Epilepsia.  
376 2016;57(12):1968–77.
- 377 18. An J, Cao Q, Lin W, An J, Wang Y, Yang L, et al. Cognition in patients with  
378 traumatic brain injury measured by the Montreal Cognitive Assessment-Basic.



- 379 Appl Neuropsychol. 2021;28(2):124–31.
- 380 19. Abraira L, Giannini N, Santamarina E, Cazorla S, Bustamante A, Quintana M,  
381 et al. Corrigendum to "Correlation of blood biomarkers with early-onset  
382 seizures after an acute stroke event" [Epilepsy Behav 104(Pt B) (2020 Mar)].  
383 Epilepsy Behav. 2020;106.
- 384 20. Sun H, Luo C, Chen X, Tao L. Assessment of cognitive dysfunction in  
385 traumatic brain injury patients: a review. Forensic Sci Res [Internet].  
386 2017;2(4):174–9. Available from:  
387 <https://www.tandfonline.com/action/journalInformation?journalCode=tfsr20>
- 388 21. Chrzaszcz M, Venkatesan C, Dragisic T, Watterson DM, Wainwright MS.  
389 Minozac treatment prevents increased seizure susceptibility in a mouse "two-  
390 hit" model of closed skull traumatic brain injury and electroconvulsive shock-  
391 induced seizures. J Neurotrauma. 2010;27(7):1283–95.
- 392 22. Shultz SR, Cardamone L, Liu YR, Edward Hogan R, MacCotta L, Wright DK,  
393 et al. Can structural or functional changes following traumatic brain injury in the  
394 rat predict epileptic outcome? Epilepsia. 2013;54(7):1240–50.
- 395 23. Khiari HM, Kechaou M, Banasr A, Zouari B, Hamdoun M, Mrabet A.  
396 Posttraumatic epilepsy in Tunisia. Epilepsy Behav [Internet]. 2011;21(4):417–  
397 9. Available from: [https://www.epilepsybehavior.com/article/S1525-  
398 5050\(11\)00281-2/fulltext](https://www.epilepsybehavior.com/article/S1525-5050(11)00281-2/fulltext)
- 399 24. Allendorfer JB, Arida RM. Role of Physical Activity and Exercise in Alleviating  
400 Cognitive Impairment in People With Epilepsy. Clin Ther. 2018;40(1):26–34.
- 401 25. Asikainen I, Kaste M, Sarna S. Early and late post-traumatic seizures in

- 402 traumatic brain injury rehabilitation patients: brain injury factors causing late  
403 seizures and influence of seizures on long-term outcome. *Epilepsia* [Internet].  
404 1999;40(5):584–9. Available from:  
405 [https://ezproxy.lib.monash.edu.au/login?url=http://ovidsp.ovid.com/ovidweb.cgi](https://ezproxy.lib.monash.edu.au/login?url=http://ovidsp.ovid.com/ovidweb.cgi?T=JS&CSC=Y&NEWS=N&PAGE=fulltext&D=med4&AN=10386527)  
406 [?T=JS&CSC=Y&NEWS=N&PAGE=fulltext&D=med4&AN=10386527](https://ezproxy.lib.monash.edu.au/login?url=http://ovidsp.ovid.com/ovidweb.cgi?T=JS&CSC=Y&NEWS=N&PAGE=fulltext&D=med4&AN=10386527)
- 407 26. Lin WJJ, Harnod T, Lin CLL, Kao CHH. Mortality risk and risk factors in  
408 patients with post-traumatic epilepsy: A population-based cohort study. *Int J*  
409 *Environ Res Public Health*. 2019 Feb;16(4):1–10.
- 410 27. Siig Hausted H, Nielsen JF, Odgaard L. Epilepsy after severe traumatic brain  
411 injury: frequency and injury severity. *Brain Inj* [Internet]. 2020/06/09.  
412 2020;34(7):889–94. Available from:  
413 <https://www.ncbi.nlm.nih.gov/pubmed/32506958>
- 414 28. Wang XP, Zhong J, Lei T, Wang HJ jiao, Zhu LN, Chu S, et al. Epidemiology  
415 of traumatic brain injury-associated epilepsy in western China: An analysis of  
416 multicenter data. *Epilepsy Res* [Internet]. 2020;164(May):106354. Available  
417 from: <https://doi.org/10.1016/j.eplepsyres.2020.106354>
- 418 29. Al-Mamoori MJ, Ebdan WR. Post-traumatic seizure. *NeuroQuantology*.  
419 2020;18(2):138–42.
- 420 30. DeGrauw X, Thurman D, Xu L, Kancherla V, DeGrauw T. Epidemiology of  
421 traumatic brain injury-associated epilepsy and early use of anti-epilepsy drugs:  
422 An analysis of insurance claims data, 2004–2014. *Epilepsy Res*. 2018  
423 Oct;146:41–9.
- 424 31. Ottman R, Barker-Cummings C, Leibson CL, Vasoli VM, Hauser WA,  
425 Buchhalter JR. Validation of a brief screening instrument for the ascertainment

- 426 of epilepsy. *Epilepsia*. 2010;51(2):191–7.
- 427 32. Fong SL, Lim KS, Tan LA, Aris T, Khalid RA, Ali RA, et al. Validation of Malay  
428 brief screening instrument for ascertainment of epilepsy. *Epilepsy Behav*  
429 [Internet]. 2019;97:206–11. Available from:  
430 <https://doi.org/10.1016/j.yebeh.2019.05.033>
- 431 33. Gaber TAZK. Evaluation of the Addenbrooke's Cognitive Examination's  
432 validity in a brain injury rehabilitation setting. *Brain Inj* [Internet]. 2008;22(7–  
433 8):589–93. Available from: <https://doi.org/10.1080/02699050802132461>
- 434 34. Kan KC, Subramaniam P, Shahrizaila N, Kamaruzzaman SB, Razali R,  
435 Ghazali SE. Validation of the Malay Version of Addenbrooke's Cognitive  
436 Examination III in Detecting Mild Cognitive Impairment and Dementia. *Dement*  
437 *Geriatr Cogn Dis Extra* [Internet]. 2019;9(1):66–76. Available from:  
438 <https://pubmed.ncbi.nlm.nih.gov/31043965>
- 439 35. Demeyere N, Riddoch MJ, Slavkova ED, Bickerton WL, Humphreys GW. The  
440 Oxford Cognitive Screen (OCS): Validation of a stroke-specific short cognitive  
441 screening tool. *Psychol Assess*. 2015;27(3):883–94.
- 442 36. Lange RT, Iverson GL, Zakrzewski MJ, Ethel-King PE, Franzen MD.  
443 Interpreting the Trail Making Test following traumatic brain injury: Comparison  
444 of traditional time scores and derived indices. *J Clin Exp Neuropsychol*.  
445 2005;27(7):897–906.
- 446 37. Periañez JA, Ríos-Lago M, Rodríguez-Sánchez JM, Adrover-Roig D, Sánchez-  
447 Cubillo I, Crespo-Facorro B, et al. Trail Making Test in traumatic brain injury,  
448 schizophrenia, and normal ageing: Sample comparisons and normative data.  
449 *Arch Clin Neuropsychol*. 2007;22(4):433–47.

- 450 38. Hariyati Shahrina Abdul Majid, Hamid HSA, Alwi AH, Sulaiman MK.  
451 Psychometric Properties of the English Version of DASS in a Sample of  
452 Malaysian Nurses. *J Psikol Malaysia*. 2019;33(1):65–9.
- 453 39. Musa R, Maskat R. Psychometric Properties of Depression Anxiety Stress  
454 Scale 21-item (DASS-21) Malay Version among a Big Sample Population.  
455 *Mediterr J Clin Psychol*. 2020;8:1–11.
- 456 40. Fong SL, Lim KS, Tan LA, Zainuddin NH, Ho JH, Chia ZJ, et al. Prevalence  
457 study of epilepsy in Malaysia. *Epilepsy Res*. 2021 Feb 1;170:106551.

458

459 **Supporting information:**

460 Appendix I: Ascertainment of epilepsy by Ottomen et al., 2010

461 Appendix II: Ascertainment of epilepsy by Fong et al., 2019

462 Appendix III: Subject data sheet

463 Appendix IV: Telephone script for verbal consent and recruitment

464 Appendix V: Patient Information Sheet (PIS)

465

466

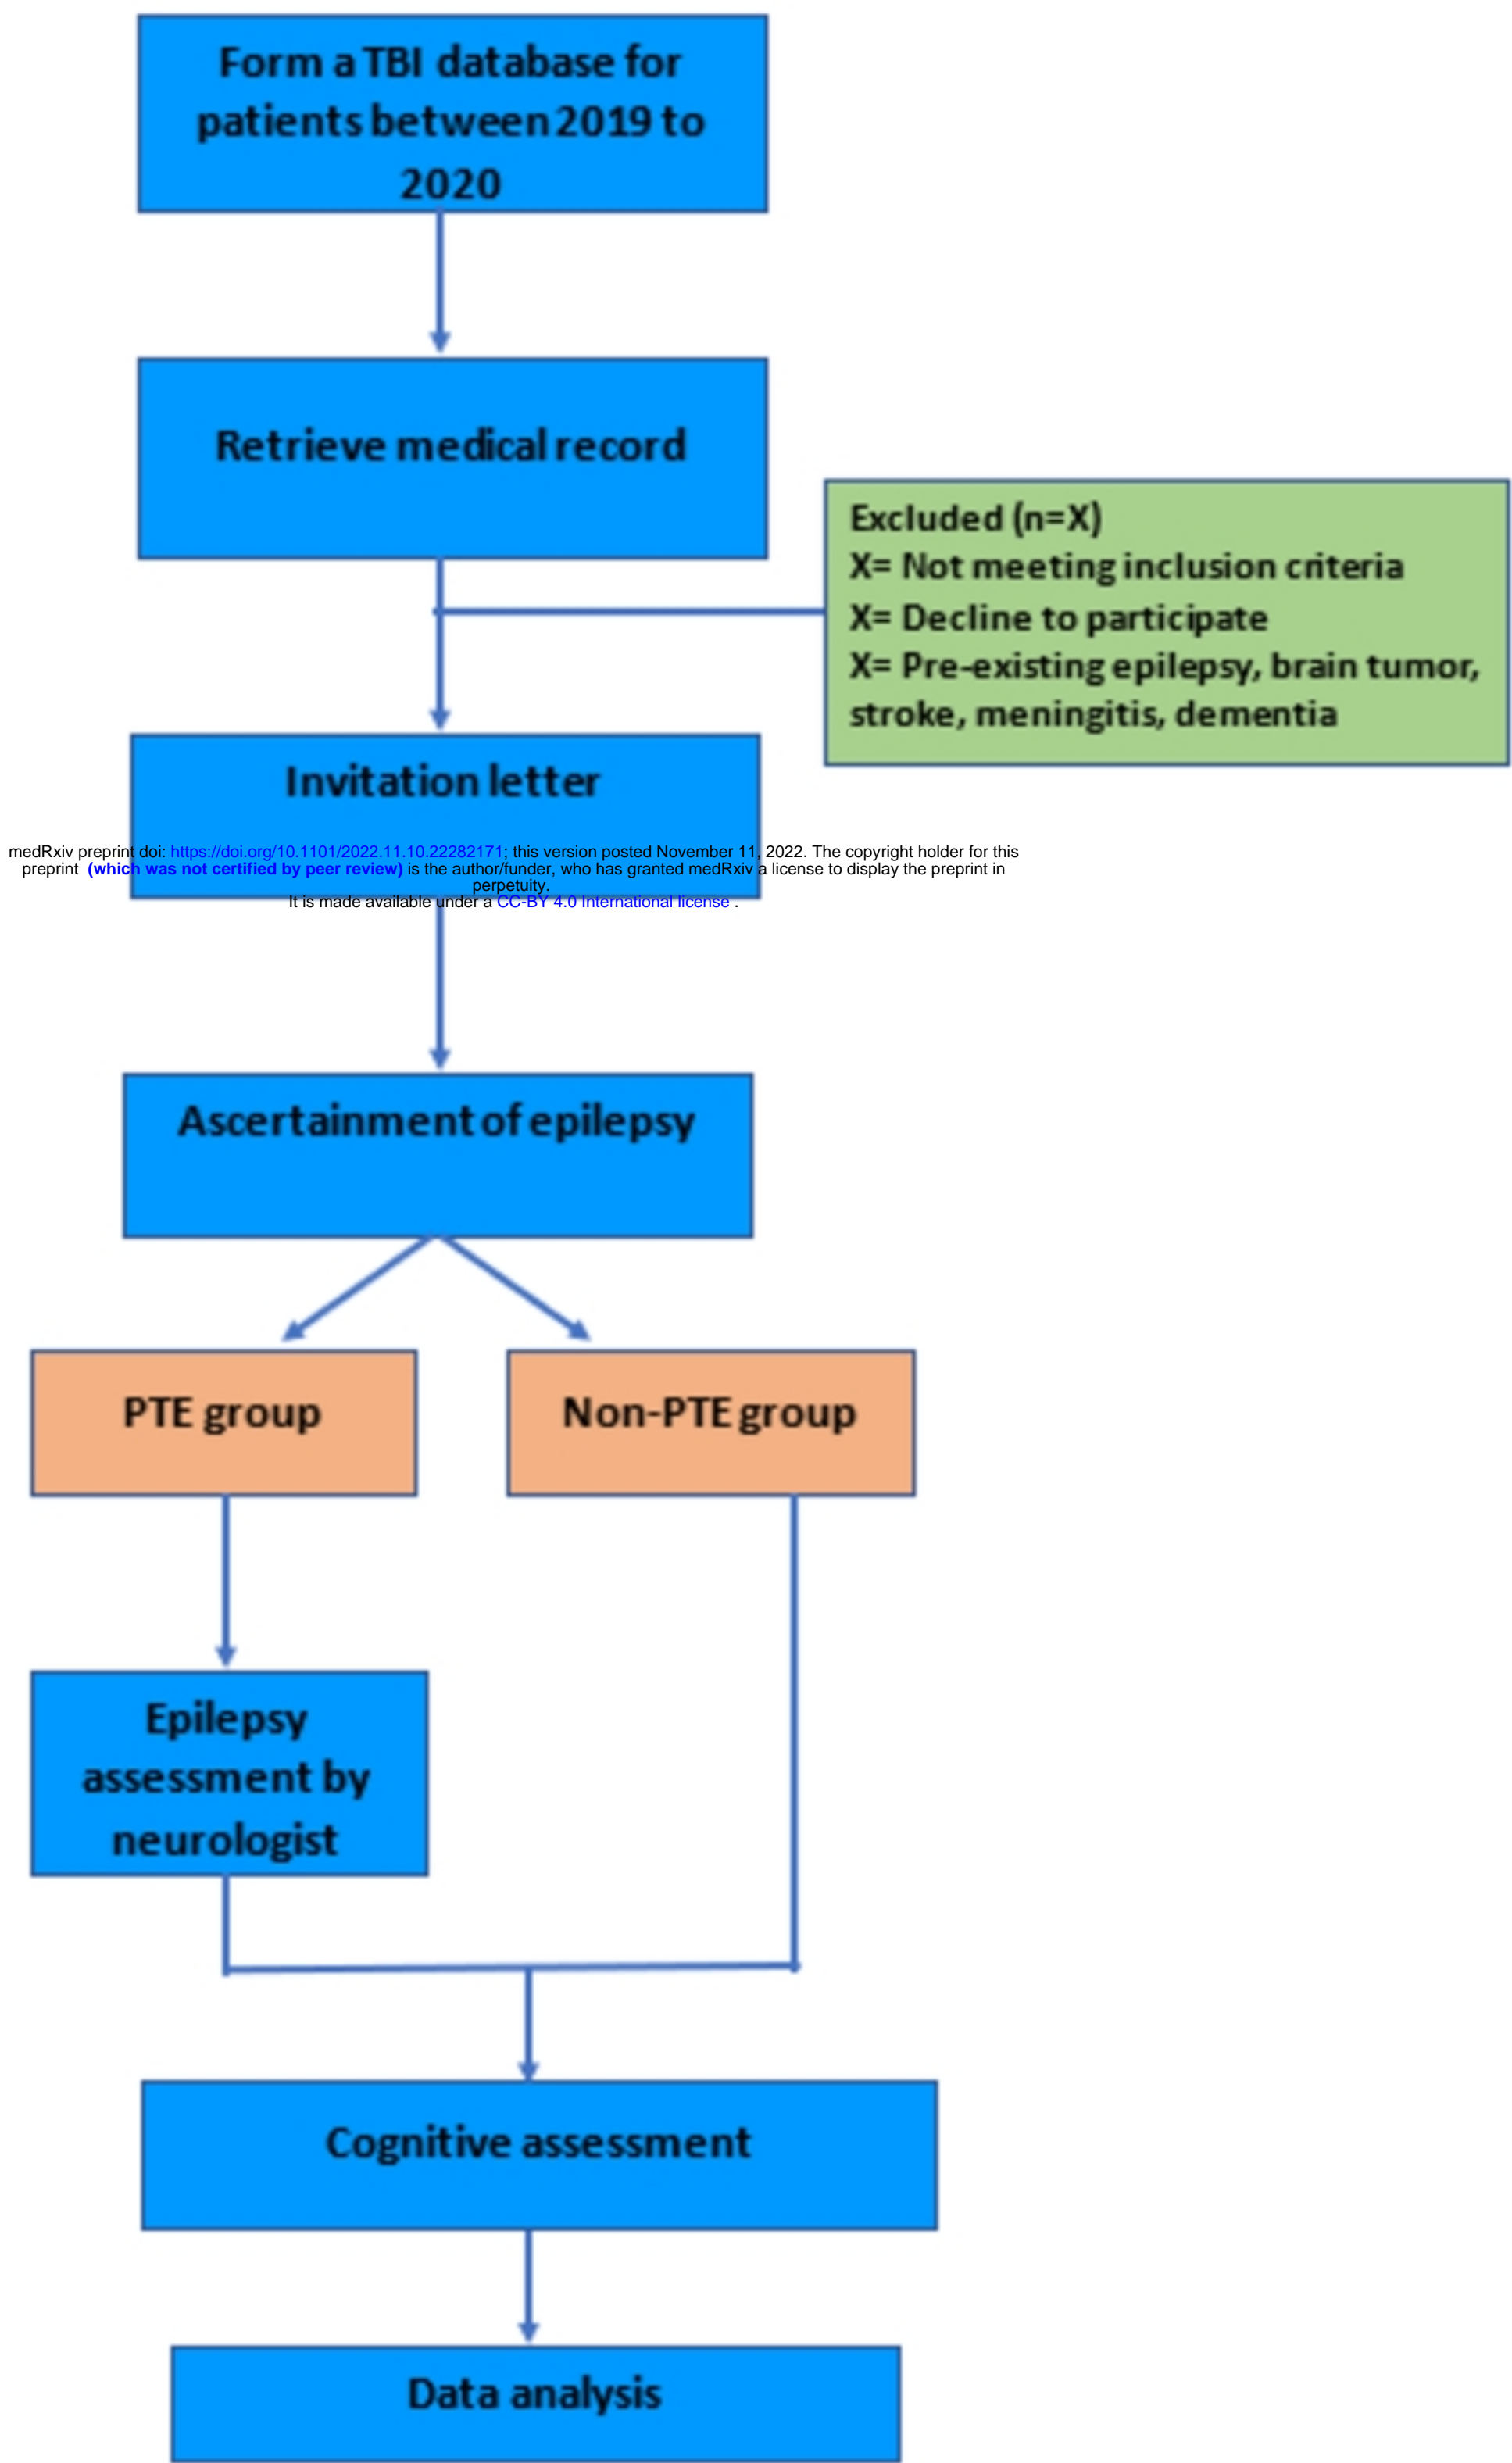

Figure
